# Supplementary material for: Use of Earth’s Magnetic Field for Mitigating Gyroscope Errors Regardless of Magnetic Perturbation
Source: MDPI journal article supplement (doi:10.3390/s111211390), 2011-11-30
Supplement: s1 [file s1]

## Correction

**Correction: Renaudin, V. *et al.* Use of Earth's Magnetic Field for Mitigating Gyroscope Errors Regardless of Magnetic Perturbation. *Sensors* 2011, 11, 11390–11414****Muhammad Haris Afzal, Valérie Renaudin \* and Gérard Lachapelle**

Department of Geomatics Engineering, Schulich School of Engineering, University of Calgary, 2500 University Drive NW, Calgary, AB T2N 1N4, Canada; E-Mails: haris.afzal@ucalgary.ca (M.H.A.); gerard.lachapelle@ucalgary.ca (G.L.)

\* Author to whom correspondence should be addressed; E-Mail: renaudin.valerie@gmail.com; Tel.: +1-403-210-9802; Fax: +1-403-284-1980.

Received: 1 June 2012 / Accepted: 20 June 2012 / Published: 20 June 2012

Although the equations' derivation in our paper published in *Sensors* 2011 [1] is correct, a typo has been found in the summarizing Equations (48) and (49). The dot on the B in the skew matrix should be removed. Equations (48) and (49) should be corrected as:

$$\delta \dot{\mathbf{B}}_{QSF_{k+1}}^b = \begin{bmatrix} \mathbf{0}_{3 \times 3} & -[\mathbf{B}_{QSF_{k+1}}^b \times] \end{bmatrix} \begin{bmatrix} \boldsymbol{\varepsilon}^n \\ \delta \mathbf{b}_\omega \end{bmatrix} + \begin{bmatrix} \mathbf{0}_{1 \times 3} & \mathbf{0}_{1 \times 3} \\ \mathbf{0}_{1 \times 3} & [\hat{\boldsymbol{\omega}}_B^b \times] \end{bmatrix} \begin{bmatrix} \mathbf{0}_{3 \times 1} \\ \boldsymbol{\eta}_B \end{bmatrix} \quad (48)$$

$$\underbrace{\begin{bmatrix} \delta \mathbf{B}_{QSF_{k+1}}^n \\ \delta \dot{\mathbf{B}}_{QSF_{k+1}}^b \end{bmatrix}}_{\delta \mathbf{z}} = \underbrace{\begin{bmatrix} -[\mathbf{B}_{QSF_k}^n \times] & \mathbf{0}_{3 \times 3} \\ \mathbf{0}_{3 \times 3} & -[\mathbf{B}_{QSF_{k+1}}^b \times] \end{bmatrix}}_{\mathbf{H}_{QSF}} \underbrace{\begin{bmatrix} \boldsymbol{\varepsilon}^n \\ \delta \mathbf{b}_\omega \end{bmatrix}}_{\delta \mathbf{x}} + \begin{bmatrix} -\mathbf{C}_b^n \\ [\hat{\boldsymbol{\omega}}_B^b \times] \end{bmatrix} \boldsymbol{\eta}_B \quad (49)$$

**Reference**

1. Afzal, M.H.; Renaudin, V.; Lachapelle, G. Use of Earth's Magnetic Field for Mitigating Gyroscope Errors Regardless of Magnetic Perturbation. *Sensors* **2011**, *11*, 11390–11414.
